1 **Title:** Integrated meditation and exercise therapy: A randomized controlled trial of a combined  
2 non-pharmacological intervention reduces disability and pain in patients with chronic low back  
3 pain  
4

5 **Authors:**

- 6 1. Anna M. Polaski, Department of Biological Sciences, Chronic Pain Research Consortium,  
7 Duquesne University, Pittsburgh, PA.
- 8 2. Amy L. Phelps, Palumbo Donahue School of Business - Statistics, Chronic Pain Research  
9 Consortium, Duquesne University, Pittsburgh, PA.
- 10 3. Thomas J. Smith, Counseling and Wellbeing Center, Duquesne University, Pittsburgh, PA.
- 11 4. Eric R. Helm, Department of Physical Medicine and Rehabilitation, University of Pittsburgh  
12 Medical Center, Pittsburgh, PA.
- 13 5. Natalia E. Morone, Section of General Internal Medicine, Boston University School of  
14 Medicine, Boston Medical Center, Boston, MA.
- 15 6. Kimberly A. Szucs, Department of Occupational Therapy, Chronic Pain Research  
16 Consortium, Duquesne University, Pittsburgh, PA.
- 17 7. Matthew C. Kostek, Department of Physical Therapy, Chronic Pain Research Consortium,  
18 Duquesne University, Pittsburgh, PA.
- 19 8. Benedict J. Kolber, Department of Biological Sciences, Chronic Pain Research Consortium,  
20 Duquesne University, Pittsburgh, PA.

21  
22 The authors have no conflicts of interest to disclose.

23 **Corresponding Author:**

24 Benedict Kolber, Duquesne University, 600 Forbes Ave, Pittsburgh, PA 15219;  
25 kolberb@duq.edu; telephone: 412-396-1704; fax: 412-396-5907

26 **ABSTRACT**

27 Integrative and complementary non-pharmacological treatments have proven efficacious in  
28 treating both the physiological and psychological symptoms of chronic pain conditions but the  
29 potential of many combined therapies is unknown. This study examined the effects of a  
30 combined intervention of mindfulness meditation followed by aerobic walking exercise in chronic  
31 low back pain (cLBP) patients. We hypothesized that meditation before exercise would reduce  
32 disability and pain by increasing mindfulness prior to physical activity. Thirty-eight adults  
33 completed either meditation and exercise treatment (MedExT) (n=18) or an audiobook control  
34 condition (n=20). Over a 4-week period, participants in the MedExT group performed 12-17  
35 minutes of guided meditation followed by 30 minutes of moderate intensity walking exercise 5  
36 days per week. Measures of disability, pain, mindfulness and anxiety were taken at baseline  
37 and post-intervention. Ratings of pain were also assessed by participant self-report, before and  
38 after each intervention session. Following MedExT, participants showed significant improvement  
39 in our primary outcome of disability compared to the control group ( $p<0.05$ ). From pre to post-  
40 intervention, MedExT also increased mindfulness ( $p<0.05$ ), but had no significant effect on  
41 quantitative sensory testing on the low back. Mean ratings of low back pain intensity and  
42 unpleasantness significantly improved with MedExT from before the study to during  
43 participation, respectively (intensity  $p<0.05$ ; unpleasantness  $p<0.05$ ). Overall, four weeks of  
44 MedExT produced substantive changes in disability, mindfulness and measures of pain intensity  
45 and unpleasantness.

46

47 **Keywords:** exercise, mindfulness meditation, QST, chronic low back pain, integrative health

## 48 **INTRODUCTION**

49           Low back pain is the most common reported type of pain [16] and the second leading  
50 cause of physician visits and disability among U.S. adults [19]. Globally, 25% of adults report  
51 having low back pain over any one month [27]. Often due to non-specific causes and  
52 complicated by comorbid symptoms [19], low back pain remains difficult to treat. Current  
53 treatments include NSAIDS, muscle relaxants, opioids, psychological therapy, physical therapy  
54 chiropractic manipulation, injections and surgery [1, 19]. Chronic low back pain is further made  
55 complex by the potential for comorbid anxiety disorders [34]. In particular, musculoskeletal pain  
56 is often associated with fear avoidance anxiety behavior and kinesiophobia [35]. This  
57 kinesiophobia or fear of movement can further exacerbate pain and subsequent disability.  
58 Kinesiophobia may also reduce the potential benefit of physical treatments in patients by  
59 increasing state anxiety before and during therapy. In treating chronic pain, a major gap exists  
60 in not only treating the physiological condition, but also addressing the interplay with  
61 psychological etiologies.

62           Due to the risk of adverse side effects, addiction and misuse, many pharmacological  
63 approaches to treating low back pain, including opioid therapeutics, have not been found to be  
64 superior to complementary treatment methods [41]. There has been a significant push in the last  
65 20 years to identify and understand complementary and integrative therapies to supplement  
66 pharmacology. Nonpharmacological therapies include aerobic exercise, tai chi, yoga,  
67 mindfulness-based stress reduction (MBSR), progressive relaxation, electromyography  
68 biofeedback, operant therapy, cognitive behavioral therapy, multidisciplinary rehabilitation,  
69 acupuncture, spinal manipulation and massage with many of these showing significant positive  
70 effects [13]. There has been considerable interest in programs that combine elements of  
71 multiple therapies to treat chronic pain. One of most well-established integrative programs that  
72 involves elements of stress reduction, exercise, and meditation is the 8-week MBSR system,  
73 which has been found to improve pain, depression and quality of life [26]. However, this

74 program requires extensive training and may not be easily accessible to some persons with  
75 cLBP. In the current study, we examined a more feasible pilot program of introductory  
76 mindfulness meditation that novice meditators could easily put into practice prior to aerobic  
77 walking exercise. Both meditation and exercise have been independently investigated in the  
78 context of back pain therapy.

79 Exercise interventions have proven to have beneficial outcomes on pain severity,  
80 physical disability, psychological function and health-related quality of life across various chronic  
81 pain conditions [23]. Mechanistically, aerobic exercise at a level of at least 70% of the maximum  
82 aerobic capacity generates the production of endorphins and elicits other pain inhibitory  
83 mechanisms driven by the central nervous system [6, 37]. In addition, aerobic exercise has  
84 been shown to reduce fatigue and improve peak oxygen uptake, and physical fitness [17, 25].

85 Similar to exercise, studies incorporating mindfulness meditation have largely shown to  
86 improve pain and depression symptoms, quality of life, well-being and increase mobility and  
87 functioning [26, 36]. Mechanistically, meditation with mindfulness has been associated with  
88 decreased levels of cortisol [28], increased signaling connections in the brain [49], improved  
89 pain processing and emotional control [31], and altered amygdalar response to emotional stimuli  
90 [15]. As these therapies (exercise and meditation) independently improve disability and pain, the  
91 Meditation and Exercise to Treat chronic low back trial (MedExT) tested the effects of a 4-week  
92 intervention of a guided mindfulness meditation program combined with moderate intensity  
93 walking exercise performed 5 days per week in chronic low back pain (cLBP) patients. We  
94 hypothesized that this intervention would improve disability (primary outcome), pain, anxiety and  
95 increase mindfulness compared to control participants. This specific therapy combination has  
96 not been previously examined in chronic pain patients.

## 97 **METHODS**

### 98 **Participants**

99 Participants were 52 adults (age 18-60) with chronic low back pain (>6 months) with no  
100 evidence of neuropathic pain, radicular pain (i.e. sciatica), or referred somatic pain. Participants  
101 were recruited using in-clinic recruitment to the University of Pittsburgh Department of Physical  
102 Medicine and Rehabilitation Research Registry (PMR3) and the University of Pittsburgh Clinical  
103 and Translational Science Institute (CTSI) patient registry, Pitt+Me. Initial pre-screening was  
104 completed during recruitment to the Pitt+Me database with phone follow-up by A.M.P. Full  
105 inclusion criteria included 1) a BMI within the normal to overweight range (18.5-29.9), 2) a  
106 resting heart rate between 60 and 100 bpm, 3) resting blood pressure less than or equal to  
107 140/90mmHg, and 4) the ability to independently ambulate community distances without  
108 external support (i.e. walker, cane). Exclusion criteria included 1) cardiovascular or respiratory  
109 disease, 2) neurological disease, unrelated to low back pain, 3) diabetes mellitus, Types 1 and  
110 2, 4) diagnosis of chronic pain condition unrelated to low back pain, 5) acute pain, 6) regular  
111 participation in high intensity athletic/sporting activities, 7) sedentary lifestyle, 8) currently  
112 pregnant individuals, 9) current cigarette smokers, 10) individuals with on-going litigation  
113 associated with back pain, 11) regular participation in meditation techniques or training in  
114 mindfulness-based stress reduction.

### 115 **Study Design**

116 This study was designed as a randomized single-blinded (for QST testing) controlled trial  
117 with repeated measures testing the effect of a combined treatment of mindfulness meditation  
118 and aerobic walking exercise (MedExT) compared to a control intervention. The trial was  
119 randomized between the two groups using a random sequence generator. M.K. was responsible  
120 for generating random allocation sequence and A.M.P. was responsible for enrolling and  
121 assigning participants to interventions. QST outcome assessor (B.J.K.) remained blinded to  
122 treatment assignment. A power analysis indicated that a minimum of 21 subjects/group to be

123 sufficient to detect statistical differences in our primary dependent variable, disability measured  
124 with the Roland Morris Disability Questionnaire (RMDQ) ( $\alpha=0.05$ , effect size=0.8,  
125 power=0.80) using the G-power calculator based on previously published work using MBSR and  
126 low-back pain. All procedures were approved by the Duquesne University Institutional Review  
127 Board (Protocol #2017-05-12) and written consent was obtained from each participant prior to  
128 testing. All methods were performed in accordance with the relevant international and local  
129 guidelines and regulations for human research. This study is registered with ClinicalTrials.gov  
130 under ID: NCT03324659 (10/30/2017). Participants were compensated for participation.

### 131 **Procedures**

132 In-clinic sessions were conducted at Duquesne University's Exercise Physiology  
133 Laboratory over the course of the 4-week intervention period between January 2018 to April  
134 2019. For participants meeting phone screening criteria, informed consent was obtained and  
135 participants were enrolled in the study. An initial clinical screening exam was performed by three  
136 clinicians (E.H. or two trained Physician Assistants). During this screening (~15 minutes),  
137 patients were evaluated for strength, lumbar range of motion, reflexes and sensation in relation  
138 to their low back pain. This screening was done to verify back pain inclusion (e.g. exclude  
139 radicular patients) and to determine safety of participation in the exercise portion of the  
140 intervention. Of 55 patients recruited, no patients were excluded during this screening.  
141 Following clinical screening patients were scheduled to start the actual intervention. The  
142 average time between consent and start of trial was 26 days. At the start of the full trial (after  
143 clinical screen), participants came in for an intake session during which they completed a  
144 battery of questionnaires (see *Instruments* below) and were oriented to the general study  
145 protocol. The intake session consisted of a sequence of quantitative sensory tests and baseline  
146 assessments of pain (see *QST* section below). B.J.K. performed all QST blinded to the  
147 treatment group of the participants and remained blinded to treatment until after the final pain  
148 assessments were completed. Participants were blinded to treatment assignments for baseline

149 intake testing. Following baseline testing, treatment assignments were disclosed to the  
150 participants.

151           Within one week of performing baseline pain assessments (average time between  
152 baseline and first intervention session = 5 days), participants completed their first in-clinic  
153 intervention session. At the start of this session, patients received approximately 35-45 minutes  
154 of meditation or stress training by a clinical psychologist (T.S.). These sessions discussed either  
155 the potential of and use of mindfulness and meditation (MedExT group) or general stress  
156 management and wellbeing for chronic pain (control group). Sessions were standardized by  
157 using a script developed by T.S. (see document, **Supplemental Digital Content 1**). Following  
158 this session, subjects completed their first intervention session, either combined meditation and  
159 exercise (MedExT) or the control condition. Participants had the option to complete intervention  
160 sessions at-home or in-clinic. Interventions were performed 5 days per week for 4 weeks. In-  
161 clinic intervention sessions were typically attended once per week. During these sessions two  
162 experimenters were present and did a check-in with the participants to ensure that they were  
163 not experiencing any difficulty completing the assigned intervention. 48 hours after the end of  
164 the 4-week period, participants attended the exit session, where they again completed surveys  
165 and underwent QST.

#### 166 **Meditation and Exercise Protocol**

167           For subjects in the MedExT experimental group, guided meditation recordings with a  
168 focus on mindfulness by meditation teacher and psychologist Dr. Tara Brach were used [9, 22].  
169 A selection of five different recordings were utilized; each recording was listened to one time per  
170 week and lasted between 12-17 minutes (see **Supplemental Digital Content 2** for URLs to  
171 recordings). Recordings were selected by T.S. along with clinical psychologist Ian C. Edwards  
172 for their focus on mindfulness and overall length. Participants were given an mp3 player  
173 (SanDisk) loaded with each of the five meditation recordings to borrow. During the weekly in-  
174 clinic session, subjects practiced the meditation portion of the intervention session in our

175 interdisciplinary meditation room which was a quiet space with low lighting and comfortable  
176 seating options. For at-home intervention sessions, subjects were encouraged to perform  
177 meditation in a quiet comfortable setting.

178           Immediately following meditation, participants performed 30 minutes of moderate  
179 intensity walking exercise on a treadmill. Prior to the first exercise session, resting heart rate  
180 and age was used to calculate a heart rate that corresponded to 50% heart rate reserve (HRR)  
181 for each participant [44]. We used the 50% HRR estimate as the target heart rate for moderately  
182 intense exercise with a range of 40-60% HRR calculated for each participant. Heart rate  
183 monitors (Polar H1) were worn for each in-clinic exercise session to monitor exertion levels.  
184 During the first in-clinic exercise session, trial coordinator A.M.P would manipulate the speed  
185 and grade of the treadmill in order to achieve the calculated heart rate for an individual  
186 participant. Average grade was 2.4% and speed range was 2.2-3.8 mph. Once reached, this  
187 speed and grade combination was used as the walking prescription for subsequent exercise  
188 sessions for that particular participant. Prior to and following exercise, each MedExT  
189 experimental intervention participant rated their perceived exertion levels using the Borg RPE  
190 scale [8]. Each exercise session began with a 2-minute warm-up at 2.5 mph and concluded with  
191 a 2-minute cool-down (total time 30 minutes on treadmill).

## 192 **Control Protocol**

193           Participants in the control group listened to an audiobook for 12-17 minutes followed by  
194 a 30-minute rest period 5 times per week for 4 weeks. Each session was time-matched to the  
195 experimental intervention group. Subjects were given an mp3 player with 20 (one for each day)  
196 recordings of *The Natural History and Antiquities of Selborne* [54], which has been previously  
197 used and validated as a neutral comparison for guided relaxation interventions [14, 51]. During  
198 the resting period, participants were free to read, watch television, listen to music or other  
199 activity that was less than moderate physical effort and not stressful.

## 200 **Survey Instruments and Administration**



201 All surveys were administered using Qualtrics XM Research Core software [45] either  
202 via a tablet for in-clinic sessions or via email for at-home sessions. All subjects completed the  
203 following questionnaires at baseline and exit: the Roland Morris Disability Questionnaire  
204 (RMDQ) [46], the State-Trait Anxiety Inventory (STAI form Y) [48], and the Fear-Avoidance  
205 Beliefs Questionnaire (FABQ) [52]. The AHA/ACSM Pre-participation Screening Form [3] and  
206 the International Physical Activity Questionnaire (IPAQ-short) [7] were also completed at  
207 baseline to assess eligibility for enrollment. The Freiburg Mindfulness Inventory (FMI) [53] was  
208 administered prior to the mindfulness training session and again at the exit session for MedExT  
209 experimental intervention subjects.

210 Pain was assessed using quantitative sensory testing methods (described below), as  
211 well as self-report measures of pain using a visual analog scale (VAS) consisting of a 10cm line  
212 with the numbers 0 and 10 at either end for intensity and unpleasantness ratings. On each day  
213 of the assigned intervention, participants received reminder emails with a URL link to the daily  
214 VAS survey, on which subjects would rate pre and post-intervention VAS pain intensity and  
215 unpleasantness. This survey was able to capture time stamps of survey progress, allowing for  
216 monitoring of protocol compliance.

217 Throughout the 4-week trial period, participants in both groups wore ActiGraph GT9X  
218 Link devices in order to monitor physical activity (steps per day). During the exit session,  
219 participants were also given an exit survey that was used to identify likelihood of continued  
220 adherence (for MedExT group) and any barriers to this intervention. This survey was  
221 qualitatively analyzed.

### 222 **Quantitative/Qualitative Sensory Testing (QST)**

223 Quantitative sensory testing was done on the bare skin of the participant's low back and  
224 forearms at specific testing sites. These assays assessed each participants' cutaneous  
225 mechanical sensitivity (threshold for mechanical detection to 0.008g, 0.02g, 0.04g, 0.07g, 0.16g,  
226 0.4g, 0.6g and 1.0g Touch Test filaments in 3 of 5 trials for filament), cutaneous mechanical

227 pain (threshold for mechanical detection up to 300g Touch Test filaments), constant heat pain  
228 (45°C 3cm x 5cm heating block applied for 3 seconds followed by 10cm Visual Analog Scale  
229 (VAS) for intensity and unpleasantness of pain), pressure pain threshold (1cm round probe  
230 applied at constant ramping pressure until participant defined cutoff in kg at “pain threshold”;  
231 Wagner Instruments, Greenwich, CT, USA) and constant pressure pain sensitivity (2 second  
232 pressure stimulus at participant defined threshold followed by VAS for intensity of pain and  
233 unpleasantness of pain) as previously described [33]. 10cm VAS scales were numbered at 0  
234 and 10. Score was measured to the nearest mm. Intensity scale ranged from 0=“*No pain*” to  
235 10=“*The worst pain imaginable*”. Unpleasantness scale ranged from 0=“*Not unpleasant*” to  
236 10=“*Most unpleasant sensation imaginable*”. Testing was performed at baseline and post-  
237 intervention to measure the overall change in sensitivity across the entire study.

### 238 **Statistical Analysis**

239 Prior to analysis, an *a priori* statistical plan was developed (ClinicalTrials.gov under ID:  
240 NCT03324659). Descriptive statistics were calculated using the IBM SPSS Version 25 and  
241 graphed with either SPSS or GraphPad Prism (Version 6.0). Normality of the data was  
242 assessed. Nonparametric inferential statistics were used for data that were not normally  
243 distributed. For analysis of primary and secondary outcomes, we were interested in looking at  
244 mean change, however the raw data values can be found as a table (see **Supplementary**  
245 **Digital Content 3**). *A priori*, we determined that participants had to complete 80% of the weekly  
246 sessions ( $\geq 4$  of 5 sessions per week) for inclusion in data analysis.

#### 247 Primary Outcome

248 The primary outcome was defined as the comparison of post-intervention RMDQ scores  
249 between the MedExT and the control groups. A two-sample t-test was used to identify a  
250 significant difference between groups using  $p < 0.05$ . This questionnaire was chosen as the

251 primary outcome measure because it was recently used in both a pilot study and large-scale  
252 assessment of MBSR in chronic low back pain patients [38, 39].

### 253 Secondary Outcomes

254 Five groups of secondary outcomes were measured and analyzed. P values were  
255 adjusted for each group of analyses based on the number of tests in that group. The first  
256 analysis tested whether the MedExT group would significantly increase mean scores on the  
257 Freiburg Mindfulness Inventory as determined by a two-sample t-test ( $p < 0.05$ ). The second  
258 explored whether the MedExT treatment would significantly influence a mean change in  
259 responses on three psychological inventories administered: 1) the Fear-Avoidance Beliefs  
260 Questionnaire, 2) the STAI state anxiety inventory and 3) the STAI state trait anxiety inventory.  
261 These were analyzed using two-sample t-tests where  $p < 0.02$  was considered significant. The  
262 third group of secondary outcomes measured mean response changes in the series of 14 QST  
263 taken at baseline and at the completion of the 4-week intervention period on the low back and  
264 non-dominant forearm. Analyses were grouped separately for tested body site. Significant mean  
265 pre/post differences between groups were identified using two-sample t-tests. Mann-Whitney-  
266 Rank-sum tests were used for mechanical sensitivity and mechanical pain at each site. Given  
267 the number of statistical tests ( $n=7$  per body site) required for the QST secondary outcome  
268 measurements, a corrected  $p < 0.005$  was utilized for each body site to determine statistical  
269 significance.

270 Fourth, we assessed current back pain using VAS during each day of the trial. These  
271 VAS measurements were repeatedly made throughout the study taken at baseline and on each  
272 intervention day, pre and post-session. These measures were the VAS pain intensity score and  
273 the VAS pain unpleasantness score. In our original stats plan, a repeated measures MANOVA  
274 was to be utilized to determine if the vector of timed responses was significantly different  
275 between the two study groups. Due to missing data from some days, the MANOVA statistical  
276 plan was modified to using a mixed error-component model during analysis of data. JMP was

277 used to perform this analysis. Participants were instructed to evaluate their on-going back pain  
278 at the time of the measurement. We looked at this in two ways: (1) the overall effect of the 4-  
279 week intervention on intensity and unpleasantness ratings (each day's pre-intervention  
280 measurement minus baseline) and (2) the acute effect of each day's session on VAS ratings  
281 (post-intervention VAS minus pre-intervention VAS).

282 Fifth, a final secondary outcome assessed "the average" pain that a participant  
283 experienced using intensity and unpleasantness VAS scales. During the exit session,  
284 participants evaluated VAS ratings of average low back pain intensity and unpleasantness that  
285 they remembered experiencing before the start of the study and after the 4 weeks of the  
286 intervention period. Significant mean response differences between groups were identified using  
287 two-sample t-tests. To correct for the number of comparisons,  $p < 0.025$  was considered a  
288 significant difference between groups.

#### 289 Demographic Variables

290 The following demographic variables were collected and compared between groups to  
291 further check against potential bias: age, sex, handedness, body mass index (BMI), baseline  
292 heart rate (HR), baseline blood pressure (BP), baseline IPAQ-short, and mean number of steps  
293 taken per day over the 4-week intervention period. This was done using two-sample t-tests.  
294 Difference in the proportion of sex and handedness was tested using the Fisher's Exact test  
295 where  $p < 0.05$  was considered significant. All other continuous variables were tested using two-  
296 sample t-tests for significant differences between the two study groups ( $p < 0.05$ ).

297

## 298 **RESULTS**

### 299 **Participant Characteristics**

300 Fifty-two adult volunteers with chronic low back pain were enrolled in this trial and thirty-  
301 eight participated in its entirety. 14 participants dropped out of the study after enrollment. This  
302 included 10 due to scheduling conflicts, 3 due to newly discovered ineligibility (e.g. neurological  
303 disorder), and 1 due to inability to complete minimum required 80% sessions per week. See  
304 **Figure 1** for flow-chart diagram. Recruitment of participants began in January 2018 and ended  
305 February 2019. Demographic characteristics of subjects are presented in **Table 1**. Two-sample  
306 t-tests revealed no significant group differences for any of the demographic variables. A Fisher's  
307 exact test found no significant relationships comparing treatment group to sex and also to  
308 handedness ( $p>0.05$ ). Using ActiGraph watch data, we compared the average number of steps  
309 taken per day for participants in both groups. After subtracting steps taken by the MedExT  
310 group during their 30-minute exercise session, we found no statistically significant difference  
311 between the groups ( $p>0.05$ ).

### 312 **Primary outcome: Intervention effects on Disability**

313 Our primary outcome was the effect of treatment on post-intervention scores of disability  
314 as measured by the RMDQ. A two-sample t-test indicated a significant improvement in disability  
315 scores for the MedExT group compared to control ( $p=0.0123$ ) (**Fig. 2**).

### 316 **Secondary outcomes: Mindfulness, Fear Avoidance, Anxiety, and Pain**

317 The FMI was administered to determine if there were any changes in mindfulness that  
318 developed during the trial. A two-sample t-test revealed a significant increase in mindfulness for  
319 the MedExT group from pre to post-intervention ( $p=0.0141$ ) (**Fig. 3A**). For the psychological  
320 inventories, we tested whether the MedExT treatment would influence a mean change in  
321 response from pre to post-intervention. Two-sample t-tests showed no significant differences  
322 between pre and post measures for the MedExT group for the FABQ ( $p>0.02$ ), STAI state  
323 anxiety ( $p>0.02$ ), or STAI trait anxiety ( $p>0.02$ ) (**Fig. 3B-D**).

324 For quantitative measures of pain (QST), we analyzed mean response changes from pre  
325 to post-intervention on the participant's low back and non-dominant forearm to determine any  
326 significant differences between groups. Body site specific data for each test are shown in **Table**  
327 **2**. For the low back and forearm, two-sample t-tests found no significant effects of treatment for  
328 constant heat pain intensity, constant heat pain unpleasantness, pressure pain threshold,  
329 constant pressure pain intensity or constant pressure pain unpleasantness ( $p>0.005$ ).  
330 Additionally, Mann-Whitney tests showed no significant differences between treatment for  
331 mechanical sensitivity or mechanical pain for either the low back or forearms ( $p>0.005$ ).

332 For VAS repeated measures of on-going back pain, we found analgesic effects of the  
333 intervention that appear to accumulate over time (**Fig. 4**). A mixed-effects model revealed a  
334 significant effect of time ( $p=0.0008$ ) and time x treatment ( $p=0.0012$ ) for intensity ratings on  
335 each day before undergoing the intervention session (**Fig. 4A**). For unpleasantness ratings pre-  
336 intervention, a mixed-effects model showed significant effects of treatment ( $p=0.0330$ ), time  
337 ( $p=0.0022$ ) and time x treatment ( $p<0.0001$ ) (**Fig. 4B**). Analysis of acute day to day effects of  
338 intervention indicated no significant effects for intensity (**Fig. 4C**), but a significant effect of  
339 treatment ( $p=0.0049$ ) for unpleasantness post – pre measures (**Fig. 4D**). That is, the intensity  
340 VAS measured immediately after the ~45-minute session was not significantly different from the  
341 VAS measured immediately before that day's session. The lack of an effect here illustrates the  
342 potential cumulative effect of the intervention on pain rather than an acute exercise-induced  
343 hypoalgesia effect.

344 An additional measure of low back pain was assessed at the exit session. Patients were  
345 asked to recall their average pain intensity and unpleasantness before the study (i.e. at  
346 baseline) and also across the last month of being in the trial (i.e. at exit session). Two-sample t-  
347 tests revealed significant mean change differences between study groups for both intensity  
348 ratings ( $p=0.0167$ ; **Fig. 5A**) and unpleasantness ratings of low back pain ( $p=0.0144$ ; **Fig. 5B**)

349 with the MedExT group showing significant improvement in their subjective evaluation of the  
350 intensity and unpleasantness of their back pain.

351 **Sub-analyses: Fully compliant patients only**

352 *A priori*, we determined that we would evaluate all participants that completed 80% of  
353 each week's sessions. This value was determined by whether participants completed the daily  
354 Qualtrics survey before/after their session. However, we reasoned that there may have been  
355 individuals in the MedExT experimental group that completed the survey, but did not actually  
356 complete the intervention. To potentially account for this non-compliance, we re-evaluated the  
357 ActiGraph GT9X watch data. We were able to monitor activity of all subjects in-clinic, as well as  
358 outside of the clinic to estimate compliance with the exercise protocol. Using walking step data  
359 from in-clinic sessions as comparison, in addition to Qualtrics survey daily log input from  
360 participants (time start and finish completed intervention), we were able to estimate participation  
361 in the walking exercise portion of the intervention for at-home sessions. We used this data to  
362 run a sub-analysis on the data. We re-ran the full data analysis on our primary and secondary  
363 outcomes for subjects that were deemed fully compliant (n=33). A list of all results is shown in  
364 **Table 3.**

365 For the primary outcome, a two-sample t-test revealed a statistically significant  
366 improvement in RMDQ scores between the MedExT and the control group ( $p=0.0199$ ). FMI  
367 scores for the MedExT group significantly increased from pre to post as measured by a two-  
368 sample t-test ( $p=0.0427$ ). For the psychological inventories, two-sample t-tests revealed no  
369 significant differences from pre to post for the MedExT group for FABQ ( $p>0.02$ ), STAI state  
370 ( $p>0.02$ ) or STAI trait ( $p>0.02$ ). Similar to our full data set, no significant differences were found  
371 between groups for QST for the low back or non-dominant forearm ( $p>0.005$ ). Two-sample t-  
372 test indicate no significant differences between groups for average change in low back pain  
373 ratings of intensity ( $p=0.1160$ ) nor unpleasantness ( $p=0.0665$ ).

374 **Exit Survey Data**

375           At the exit session, all patients were asked to complete a continued patient compliance  
376 survey that we developed. The results of these outcomes are shown in **Fig. 6**. This survey  
377 sought to identify the need for pain treatments during the study (**Fig. 6A**), the likelihood of  
378 continued compliance post-study (**Fig. 6A**), any barriers to continuing the combined treatment  
379 (**Fig. 6B**) and the most beneficial aspect of the intervention between meditation, exercise, or the  
380 combination (**Fig. 6C**). We found qualitatively that MedExT participants reported a greater  
381 decrease in pain medication use and seemed fairly likely to continue the intervention.  
382 Importantly, when MedExT experimental participants were asked to identify the most beneficial  
383 aspects of the intervention (i.e. meditation, exercise or both) a majority of participants stated  
384 that “Both” components of the intervention were the most important.



## 385 **DISCUSSION**

386           In the current study, we assessed the effect of a combined intervention of mindfulness  
387 meditation followed by aerobic walking exercise in chronic low back pain. The main findings of  
388 this study indicate that meditation and exercise together were able to reduce disability, increase  
389 mindfulness and decrease self-reported ratings of low back pain. To our knowledge, this specific  
390 therapy combination has not yet been tested in chronic low back pain patients.

391           While the present study took a unique approach to combined mindfulness and aerobic  
392 exercise, there is a robust literature suggesting that such an approach could work. First and  
393 foremost, previous studies have tested MBSR [4, 12, 20, 38, 39, 47] and mindfulness meditation  
394 [58] alone, as well as aerobic walking exercise programs [5, 10, 18, 24, 30, 32, 40, 50] in low  
395 back pain patients. Overall, these studies found improved disability, sleep quality, psychological  
396 function, depression, affective pain perception, fitness, pain severity, and reduced need for pain  
397 medications. One important aspect of the mindfulness used in the present study was the  
398 accessibility of the mindfulness. Beyond the introductory 45-minute session with a clinical  
399 psychologist, our participants were naïve meditators. Nonetheless, using only five short  
400 recordings repeatedly, their mindfulness increased as assessed by the FMI. Gains seen in this  
401 study via the FMI compare to more intensive training exercises [11]. Although the recordings  
402 used here were curated for their emphasis on mindfulness, they were not specifically recorded  
403 for this intervention. We would hypothesize that the development of a mindfulness recording  
404 that specifically prepared participants for the subsequent exercise could be even more  
405 beneficial. The benefits seen here with a brief meditation program are consistent with more  
406 recent data showing that only 4 days of mindfulness-based mental training can reduce pain [55-  
407 57]. Importantly, these previous studies were done in healthy participants with models of acute  
408 nociception, while here we are showing gains in mindfulness in a chronic patient population.

409           In our previous work, we have elucidated that increasing the frequency component of  
410 exercise dose to be the most likely to have a positive effect on chronic pain patients [43]. We

411 tested these predictions in a trial with multiple doses of moderate intensity treadmill walking  
412 exercise in healthy subjects. Treadmill walking exercise was chosen because it was easy to  
413 implement, required little to no training and had more precision in controlling dosage. In this  
414 study, we found that the moderate dose, or 5x of 30 minutes/day of this exercise regimen in one  
415 week proved to be the most optimal for reducing cutaneous pressure pain ratings [42]. We  
416 reasoned that this aerobic exercise intervention was a good starting dose for reducing pain  
417 outcomes. In addition, this prescription aligns with that of ACSM's recommendation for physical  
418 activity for healthy individuals which is 150 MET minutes per week [21].

419 Surprisingly, while MedExT participants rated lower disability along with lower on-going  
420 pain and lower average pain compared to the start of trial, they failed to show any changes in  
421 fear avoidance behavior or anxiety. This result is in contrast to data generated from a similar  
422 study that implemented combined mindfulness and exercise in the context of major depression  
423 [2]. That study found 8 weeks of 60-minute twice a week mental and physical training  
424 significantly reduced depressive symptoms and ruminative thoughts. It is possible that the lack  
425 of a significant effect on fear and anxiety in the present study was driven by the lower starting  
426 anxiety and fear levels in our cohort of participants. We anticipate that the anxiolytic effects of  
427 the combined intervention may only present itself in the context of higher baseline anxiety and  
428 fear avoidance behavior or with longer duration studies (i.e. 8 vs 4 weeks).

429 During the trial, participants rated pain before and after each session. Thus, we were  
430 able to track their on-going pain before each intervention compared to baseline and evaluate the  
431 potential for acute analgesic effects of the intervention itself. Analysis of day to day pre-  
432 intervention ratings of on-going low back pain revealed significant effects of time and time x  
433 treatment for intensity ( $p=0.0144$ ,  $p=0.0012$ ) and unpleasantness ( $p=0.0237$ ,  $p<0.0001$ ),  
434 respectively. Acutely however, there were no significant changes comparing pre-intervention to  
435 post-intervention on single days. Taken together, these data are indicative of a time dependent  
436 effect of the intervention with beneficial outcomes resulting from cumulative repeated treatment

437 sessions. Interestingly, the data do not begin to show separation across time between the  
438 groups until about day eight for pain intensity ratings and day ten for pain unpleasantness  
439 ratings. This suggests that for this specific intervention, sustained analgesic benefit can only be  
440 achieved after 8-10 sessions or about two weeks of effort.

441 Our data show significant differences in qualitative ratings of low back pain, but no  
442 significant effects with QST. Interestingly, we do see trends for decreased ratings of pain  
443 unpleasantness ( $p=0.0338$ ) in response to a noxious constant pressure stimulus applied to the  
444 low back. Although, subjects' pressure pain threshold was unchanged from baseline, their  
445 perception of that same pain declined. These paradoxical effects are consistent with that of a  
446 previous study that tested aerobic treadmill walking exercise on painful QST in healthy  
447 participants [42]. Similar effects have also been shown in sustained aerobic exercise, where  
448 training induced increases in pain tolerance, but unaltered pressure pain threshold [29].

449 Using daily Qualtrics survey monitoring and wrist-worn activity trackers, we were able to  
450 estimate compliance from participants beyond self-report. Results from a sub-analysis for fully  
451 compliant patients only (MedExT;  $n=13$ , Control;  $n=20$ ) shows significant improvements in  
452 disability and an increase in mindfulness for MedExT subjects, which is consistent with our  
453 analysis of the full data set (MedExT;  $n=18$ , Control;  $n=20$ ). Even the individuals who were  
454 estimated to be noncompliant ( $n=5$ ) still exercised at least 7 days. Overall, this analysis  
455 suggests that compliance was not a major confound of the reported results.

456 Results of our continued compliance survey given during the exit session shows  
457 favorable outcomes for the combined meditation and exercise intervention. In particular, the  
458 finding that a majority of MedExT group participants found the most beneficial component of the  
459 intervention was the combination of the exercise and meditation suggests the potential for  
460 synergistic effects in this study. The need for pharmacological pain treatments trended to  
461 decrease for the MedExT group compared to control subjects, which suggests analgesic benefit

462 of a solely nonpharmacological source. MedExT participants also indicated that they would be  
463 likely to continue the combined intervention on their own to manage their back-pain symptoms.

#### 464 **Strengths and Limitations**

465 Notable strengths to this study included a low risk of detection bias through blinding of  
466 the outcome assessor for QST, and a lack of confounding demographic variables. The average  
467 age of study participants was 37.6 years, which accurately represents the range of our inclusion  
468 criteria (18-60). Additionally, after subtracting intervention walking steps, there was no statistical  
469 difference in average steps per day between control and MedExT subjects. The most significant  
470 limitation to this study is the lack of all possible study arms. Without exercise-only and  
471 meditation-only groups, the hypothesis of synergy between the individual therapies cannot be  
472 specifically tested. This study had a higher risk of performance bias, due to lack of blinding of  
473 participants, which is very difficult due to the nature of the interventions. Also, the order of QST  
474 assessment was not randomized, which could contribute to additional outcome bias. These  
475 tests were performed from least invasive to most invasive, to avoid increased sensitization.  
476 Patients in this trial were mostly female (n=25) compared to male (n=13), however chronic low  
477 back pain is reported to be more prevalent among women [27]. According to our continued  
478 compliance survey, the most prominently identified barriers to continuing this treatment after  
479 conclusion of the trial included time and motivation to complete both interventions. Notably, no  
480 patients reported increased pain with both meditation and exercise. Thus, while we cannot state  
481 conclusively that there was synergy between the treatments, we can be confident that the  
482 therapies are not overtly antagonist. Other reported barriers included lack of access to a  
483 treadmill or guided meditations. Although, it is worth noting that access to additional meditations  
484 were provided to interested patients following their completion of the trial.

#### 485 **Clinical Implications**

486 The results of this study demonstrate that a combined therapy approach of mindfulness  
487 meditation followed by moderate intensity treadmill walking provides a significant benefit to

488 disability, mindfulness and perception of low back pain. Patients in this treatment group also  
489 report less need for pain medications, and favorability for the combined approach as opposed to  
490 meditation or exercise therapy alone. This is the first study testing this treatment combination in  
491 chronic low back pain patients. Because synergistic benefits could not be definitely determined  
492 from this trial, future studies must be done to conclude the most efficacious combination of this  
493 treatment regimen. Nonetheless, we feel the potential for this combined approach to improve  
494 outcomes in chronic low back pain is high. As exercise and meditation (as practiced in this  
495 study) are low cost, easy to implement, and carry few negative side-effects, we are optimistic  
496 about the use of this or similar integrative therapy in the clinic.

497

498

#### 499 **Conflict of interest statement**

500 The authors have no conflicts of interest to disclose.

#### 501 **ACKNOWLEDGEMENTS**

502 The authors would like to thank the participants who volunteered for this research. We would  
503 like to thank Allison Morgan, PAc and Kristin D'Acunto, PAc for assistance in performing back  
504 pain evaluations for eligibility screening. We would also like to thank Dana Farrel for research  
505 facilitation, Kerri Jackson for Pitt+Me coordination, Sadie Riskus for Qualtrics survey compilation  
506 and optimization and Dr. Ian Edwards for mindfulness meditation consultation. Funding for this  
507 work was supported by the National Institutes of Health through Grant Number UL1TR001857  
508 and through a Pain Research Challenge Grant supported by the Clinical and Translational  
509 Science Institute at the University of Pittsburgh and the Virginia Kaufmann Foundation.

510 **REFERENCES**

- 511 [1] Abraham, P., Rennert, R.C., Martin, J.R., Ciacci, J., Taylor, W., Resnick, D., Kasper, E., and  
512 Chen, C.C., *The role of surgery for treatment of low back pain: insights from the randomized*  
513 *controlled Spine Patient Outcomes Research Trials*. Surg Neurol Int, 2016. **7**: p. 38.
- 514 [2] Alderman, B.L., Olson, R.L., Brush, C.J., and Shors, T.J., *MAP training: combining*  
515 *meditation and aerobic exercise reduces depression and rumination while enhancing*  
516 *synchronized brain activity*. Transl Psychiatry, 2016. **6**: p. e726.
- 517 [3] Balady, G.J., Chaitman, B., Driscoll, D., Foster, C., Froelicher, E., Gordon, N., Pate, R.,  
518 Rippe, J., and Bazzarre, T., *Recommendations for cardiovascular screening, staffing, and*  
519 *emergency policies at health/fitness facilities*. Circulation, 1998. **97**(22): p. 2283-93.
- 520 [4] Banth, S. and Ardebil, M.D., *Effectiveness of mindfulness meditation on pain and quality of*  
521 *life of patients with chronic low back pain*. Int J Yoga, 2015. **8**(2): p. 128-33.
- 522 [5] Barker, K.L., Dawes, H., Hansford, P., and Shamley, D., *Perceived and measured levels of*  
523 *exertion of patients with chronic back pain exercising in a hydrotherapy pool*. Arch Phys Med  
524 Rehabil, 2003. **84**(9): p. 1319-23.
- 525 [6] Bender, T., Nagy, G., Barna, I., Tefner, I., Kadas, E., and Geher, P., *The effect of physical*  
526 *therapy on beta-endorphin levels*. Eur J Appl Physiol, 2007. **100**(4): p. 371-82.
- 527 [7] Booth, M., *Assessment of physical activity: an international perspective*. Res Q Exerc Sport,  
528 2000. **71 Suppl 2**: p. 114-20.
- 529 [8] Borg, G.A., *Psychophysical bases of perceived exertion*. Med Sci Sports Exerc, 1982. **14**(5):  
530 p. 377-81.
- 531 [9] Brach, T. 2019; Available from: <https://www.tarabrach.com>.
- 532 [10] Chan, C.W., Mok, N.W., and Yeung, E.W., *Aerobic exercise training in addition to*  
533 *conventional physiotherapy for chronic low back pain: a randomized controlled trial*. Arch Phys  
534 Med Rehabil, 2011. **92**(10): p. 1681-5.

- 535 [11] Chandran, S., Raman, R., Kishor, M., and Nandeesh, H.P., *The effectiveness of*  
536 *mindfulness meditation in relief of symptoms of depression and quality of life in patients with*  
537 *gastroesophageal reflux disease*. Indian J Gastroenterol, 2019. **38**(1): p. 29-38.
- 538 [12] Cherkin, D.C., Sherman, K.J., Balderson, B.H., Cook, A.J., Anderson, M.L., Hawkes, R.J.,  
539 Hansen, K.E., and Turner, J.A., *Effect of Mindfulness-Based Stress Reduction vs Cognitive*  
540 *Behavioral Therapy or Usual Care on Back Pain and Functional Limitations in Adults With*  
541 *Chronic Low Back Pain: A Randomized Clinical Trial*. JAMA, 2016. **315**(12): p. 1240-9.
- 542 [13] Chou, R., Deyo, R., Friedly, J., Skelly, A., Hashimoto, R., Weimer, M., Fu, R., Dana, T.,  
543 Kraegel, P., Griffin, J., Grusing, S., and Brodt, E.D., *Nonpharmacologic Therapies for Low Back*  
544 *Pain: A Systematic Review for an American College of Physicians Clinical Practice Guideline*.  
545 Ann Intern Med, 2017. **166**(7): p. 493-505.
- 546 [14] Cropley, M., Ussher, M., and Charitou, E., *Acute effects of a guided relaxation routine*  
547 *(body scan) on tobacco withdrawal symptoms and cravings in abstinent smokers*. Addiction,  
548 2007. **102**(6): p. 989-93.
- 549 [15] Desbordes, G., Negi, L.T., Pace, T.W., Wallace, B.A., Raison, C.L., and Schwartz, E.L.,  
550 *Effects of mindful-attention and compassion meditation training on amygdala response to*  
551 *emotional stimuli in an ordinary, non-meditative state*. Front Hum Neurosci, 2012. **6**: p. 292.
- 552 [16] Deyo, R.A., Mirza, S.K., and Martin, B.I., *Back pain prevalence and visit rates: estimates*  
553 *from U.S. national surveys, 2002*. Spine (Phila Pa 1976), 2006. **31**(23): p. 2724-7.
- 554 [17] Dinler, M., Diracoglu, D., Kasikcioglu, E., Sayli, O., Akin, A., Aksoy, C., Oncel, A., and  
555 Berker, E., *Effect of aerobic exercise training on oxygen uptake and kinetics in patients with*  
556 *fibromyalgia*. Rheumatol Int, 2009. **30**(2): p. 281-4.
- 557 [18] Eadie, J., van de Water, A.T., Lonsdale, C., Tully, M.A., van Mechelen, W., Boreham, C.A.,  
558 Daly, L., McDonough, S.M., and Hurley, D.A., *Physiotherapy for sleep disturbance in people*  
559 *with chronic low back pain: results of a feasibility randomized controlled trial*. Arch Phys Med  
560 Rehabil, 2013. **94**(11): p. 2083-92.

- 561 [19] Ehrlich, G.E., *Low back pain*. Bull World Health Organ, 2003. **81**(9): p. 671-6.
- 562 [20] Esmer, G., Blum, J., Rulf, J., and Pier, J., *Mindfulness-based stress reduction for failed*  
563 *back surgery syndrome: a randomized controlled trial*. J Am Osteopath Assoc, 2010. **110**(11): p.  
564 646-52.
- 565 [21] Garber, C.E., Blissmer, B., Deschenes, M.R., Franklin, B.A., Lamonte, M.J., Lee, I.M.,  
566 Nieman, D.C., Swain, D.P., and American College of Sports, M., *American College of Sports*  
567 *Medicine position stand. Quantity and quality of exercise for developing and maintaining*  
568 *cardiorespiratory, musculoskeletal, and neuromotor fitness in apparently healthy adults:*  
569 *guidance for prescribing exercise*. Med Sci Sports Exerc, 2011. **43**(7): p. 1334-59.
- 570 [22] Gelles, D. *How to Meditate*. The New York Times, 2016.
- 571 [23] Geneen, L.J., Moore, R.A., Clarke, C., Martin, D., Colvin, L.A., and Smith, B.H., *Physical*  
572 *activity and exercise for chronic pain in adults: an overview of Cochrane Reviews*. Cochrane  
573 Database Syst Rev, 2017. **4**: p. CD011279.
- 574 [24] Hartvigsen, J., Morso, L., Bendix, T., and Manniche, C., *Supervised and non-supervised*  
575 *Nordic walking in the treatment of chronic low back pain: a single blind randomized clinical trial*.  
576 BMC Musculoskelet Disord, 2010. **11**: p. 30.
- 577 [25] Hauser, W., Klose, P., Langhorst, J., Moradi, B., Steinbach, M., Schiltenswolf, M., and  
578 Busch, A., *Efficacy of different types of aerobic exercise in fibromyalgia syndrome: a systematic*  
579 *review and meta-analysis of randomised controlled trials*. Arthritis Res Ther, 2010. **12**(3): p.  
580 R79.
- 581 [26] Hilton, L., Hempel, S., Ewing, B.A., Apaydin, E., Xenakis, L., Newberry, S., Colaiaco, B.,  
582 Maher, A.R., Shanman, R.M., Sorbero, M.E., and Maglione, M.A., *Mindfulness Meditation for*  
583 *Chronic Pain: Systematic Review and Meta-analysis*. Ann Behav Med, 2017. **51**(2): p. 199-213.
- 584 [27] Hoy, D., Bain, C., Williams, G., March, L., Brooks, P., Blyth, F., Woolf, A., Vos, T., and  
585 Buchbinder, R., *A systematic review of the global prevalence of low back pain*. Arthritis Rheum,  
586 2012. **64**(6): p. 2028-37.



- 587 [28] Jacobs, T.L., Shaver, P.R., Epel, E.S., Zanesco, A.P., Aichele, S.R., Bridwell, D.A.,  
588 Rosenberg, E.L., King, B.G., Maclean, K.A., Sahdra, B.K., Kemeny, M.E., Ferrer, E., Wallace,  
589 B.A., and Saron, C.D., *Self-reported mindfulness and cortisol during a Shamatha meditation*  
590 *retreat*. Health Psychol, 2013. **32**(10): p. 1104-9.
- 591 [29] Jones, M.D., Booth, J., Taylor, J.L., and Barry, B.K., *Aerobic training increases pain*  
592 *tolerance in healthy individuals*. Med Sci Sports Exerc, 2014. **46**(8): p. 1640-7.
- 593 [30] Kell, R.T. and Asmundson, G.J., *A comparison of two forms of periodized exercise*  
594 *rehabilitation programs in the management of chronic nonspecific low-back pain*. J Strength  
595 Cond Res, 2009. **23**(2): p. 513-23.
- 596 [31] Kerr, C.E., Sacchet, M.D., Lazar, S.W., Moore, C.I., and Jones, S.R., *Mindfulness starts*  
597 *with the body: somatosensory attention and top-down modulation of cortical alpha rhythms in*  
598 *mindfulness meditation*. Front Hum Neurosci, 2013. **7**: p. 12.
- 599 [32] Koldas Dogan, S., Sonel Tur, B., Kurtais, Y., and Atay, M.B., *Comparison of three different*  
600 *approaches in the treatment of chronic low back pain*. Clin Rheumatol, 2008. **27**(7): p. 873-81.
- 601 [33] Kostek, M., Polaski, A., Kolber, B., Ramsey, A., Kranjec, A., and Szucs, K., *A protocol of*  
602 *manual tests to measure sensation and pain in humans*. J Vis Exp, 2016(118).
- 603 [34] Kroenke, K., Outcalt, S., Krebs, E., Bair, M.J., Wu, J., Chumbler, N., and Yu, Z.,  
604 *Association between anxiety, health-related quality of life and functional impairment in primary*  
605 *care patients with chronic pain*. Gen Hosp Psychiatry, 2013. **35**(4): p. 359-65.
- 606 [35] Lundberg, M., Grimby-Ekman, A., Verbunt, J., and Simmonds, M.J., *Pain-related fear: a*  
607 *critical review of the related measures*. Pain Res Treat, 2011. **2011**: p. 494196.
- 608 [36] Majeed, M.H., Ali, A.A., and Sudak, D.M., *Mindfulness-based interventions for chronic*  
609 *pain: Evidence and applications*. Asian J Psychiatr, 2017. **32**: p. 79-83.
- 610 [37] Millan, M.J., *Descending control of pain*. Prog Neurobiol, 2002. **66**(6): p. 355-474.

- 611 [38] Morone, N.E., Greco, C.M., Moore, C.G., and et al., *A mind-body program for older adults*  
612 *with chronic low back pain: A randomized clinical trial*. JAMA Internal Medicine, 2016. **176**(3): p.  
613 329-337.
- 614 [39] Morone, N.E., Rollman, B.L., Moore, C.G., Li, Q., and Weiner, D.K., *A mind-body program*  
615 *for older adults with chronic low back pain: results of a pilot study*. Pain Med, 2009. **10**(8): p.  
616 1395-407.
- 617 [40] Murtezani, A., Hundozi, H., Orovcanec, N., Sllamniku, S., and Osmani, T., *A comparison of*  
618 *high intensity aerobic exercise and passive modalities for the treatment of workers with chronic*  
619 *low back pain: a randomized, controlled trial*. Eur J Phys Rehabil Med, 2011. **47**(3): p. 359-66.
- 620 [41] Pedersen, L. and Fredheim, O., *Opioids for chronic noncancer pain: still no evidence for*  
621 *superiority of sustained-release opioids*. Clin Pharmacol Ther, 2015. **97**(2): p. 114-5.
- 622 [42] Polaski A. M., Phelps A. L., Kostek M. C., Szucs K. A., Kolber B. K. *Dose-related effects of*  
623 *moderate intensity walking exercise on sensitivity to pain in healthy humans in American*  
624 *College of Sports Medicine*. 2019. Orlando, FL.
- 625 [43] Polaski, A.M., Phelps, A.L., Kostek, M.C., Szucs, K.A., and Kolber, B.J., *Exercise-induced*  
626 *hypoalgesia: A meta-analysis of exercise dosing for the treatment of chronic pain*. PLoS One,  
627 2019. **14**(1): p. e0210418.
- 628 [44] Pollock, M.L., Gaesser G.A., Butcher J.D., Despres, J.P., Dishman, R.K., Franklin, B.A.,  
629 Garber, C.E., *American College of Sports Medicine Position Stand. The recommended quantity*  
630 *and quality of exercise for developing and maintaining cardiorespiratory and muscular fitness,*  
631 *and flexibility in healthy adults*. Med Sci Sports Exerc, 1998. **30**(6): p. 975-91.
- 632 [45] Qualtrics. 2019: Provo, Utah, USA.
- 633 [46] Roland, M. and Morris, R., *A study of the natural history of back pain. Part I: development*  
634 *of a reliable and sensitive measure of disability in low-back pain*. Spine (Phila Pa 1976), 1983.  
635 **8**(2): p. 141-4.

- 636 [47] Schmidt, S., Gmeiner, S., Schultz, C., Lower, M., Kuhn, K., Naranjo, J.R., Brenneisen, C.,  
637 and Hinterberger, T., *Mindfulness-based Stress Reduction (MBSR) as Treatment for Chronic*  
638 *Back Pain - an Observational Study with Assessment of Thalamocortical Dysrhythmia*. *Forsch*  
639 *Komplementmed*, 2015. **22**(5): p. 298-303.
- 640 [48] Spielberger, C.D., & Sydeman, S.J., *State-Trait Anxiety Inventory and State-Trait Anger*  
641 *Expression Inventory*. The Use of Psychological Testing for Treatment Planning and Outcome  
642 Assessment. 1994, Hillsdale, NJ, USA: L. Erlbaum Associates.
- 643 [49] Tang, Y.Y., Lu, Q., Fan, M., Yang, Y., and Posner, M.I., *Mechanisms of white matter*  
644 *changes induced by meditation*. *Proc Natl Acad Sci U S A*, 2012. **109**(26): p. 10570-4.
- 645 [50] Turner, J.A., Clancy, S., McQuade, K.J., and Cardenas, D.D., *Effectiveness of behavioral*  
646 *therapy for chronic low back pain: a component analysis*. *J Consult Clin Psychol*, 1990. **58**(5): p.  
647 573-9.
- 648 [51] Ussher, M., Cropley, M., Playle, S., Mohidin, R., and West, R., *Effect of isometric exercise*  
649 *and body scanning on cigarette cravings and withdrawal symptoms*. *Addiction*, 2009. **104**(7): p.  
650 1251-7.
- 651 [52] Waddell, G., Newton, M., Henderson, I., Somerville, D., and Main, C.J., *A Fear-Avoidance*  
652 *Beliefs Questionnaire (FABQ) and the role of fear-avoidance beliefs in chronic low back pain*  
653 *and disability*. *Pain*, 1993. **52**(2): p. 157-68.
- 654 [53] Walach, H., Buchheld, N., Buttenmuller, V., Kleinknecht, N., Schmidt, S., *Measuring*  
655 *Mindfulness — The Freiburg Mindfulness Inventory (FMI)*. *Personality and Individual*  
656 *Differences*, 2006. **40**: p. 1543-1555.
- 657 [54] White, G., *Natural History and Antiquities of Selborne*. 1908, Cassell: London.
- 658 [55] Zeidan, F., Adler-Neal, A.L., Wells, R.E., Stagnaro, E., May, L.M., Eisenach, J.C.,  
659 McHaffie, J.G., and Coghill, R.C., *Mindfulness-Meditation-Based Pain Relief Is Not Mediated by*  
660 *Endogenous Opioids*. *J Neurosci*, 2016. **36**(11): p. 3391-7.

- 661 [56] Zeidan, F., Emerson, N.M., Farris, S.R., Ray, J.N., Jung, Y., McHaffie, J.G., and Coghill,  
662 R.C., *Mindfulness Meditation-Based Pain Relief Employs Different Neural Mechanisms Than*  
663 *Placebo and Sham Mindfulness Meditation-Induced Analgesia*. J Neurosci, 2015. **35**(46): p.  
664 15307-25.
- 665 [57] Zeidan, F. and Vago, D.R., *Mindfulness meditation-based pain relief: a mechanistic*  
666 *account*. Ann N Y Acad Sci, 2016. **1373**(1): p. 114-27.
- 667 [58] Zgierska, A.E., Burzinski, C.A., Cox, J., Kloke, J., Stegner, A., Cook, D.B., Singles, J.,  
668 Mirgain, S., Coe, C.L., and Backonja, M., *Mindfulness Meditation and Cognitive Behavioral*  
669 *Therapy Intervention Reduces Pain Severity and Sensitivity in Opioid-Treated Chronic Low*  
670 *Back Pain: Pilot Findings from a Randomized Controlled Trial*. Pain Med, 2016. **17**(10): p. 1865-  
671 1881.
- 672

673 **Figure 1.** Consort Flow Diagram.

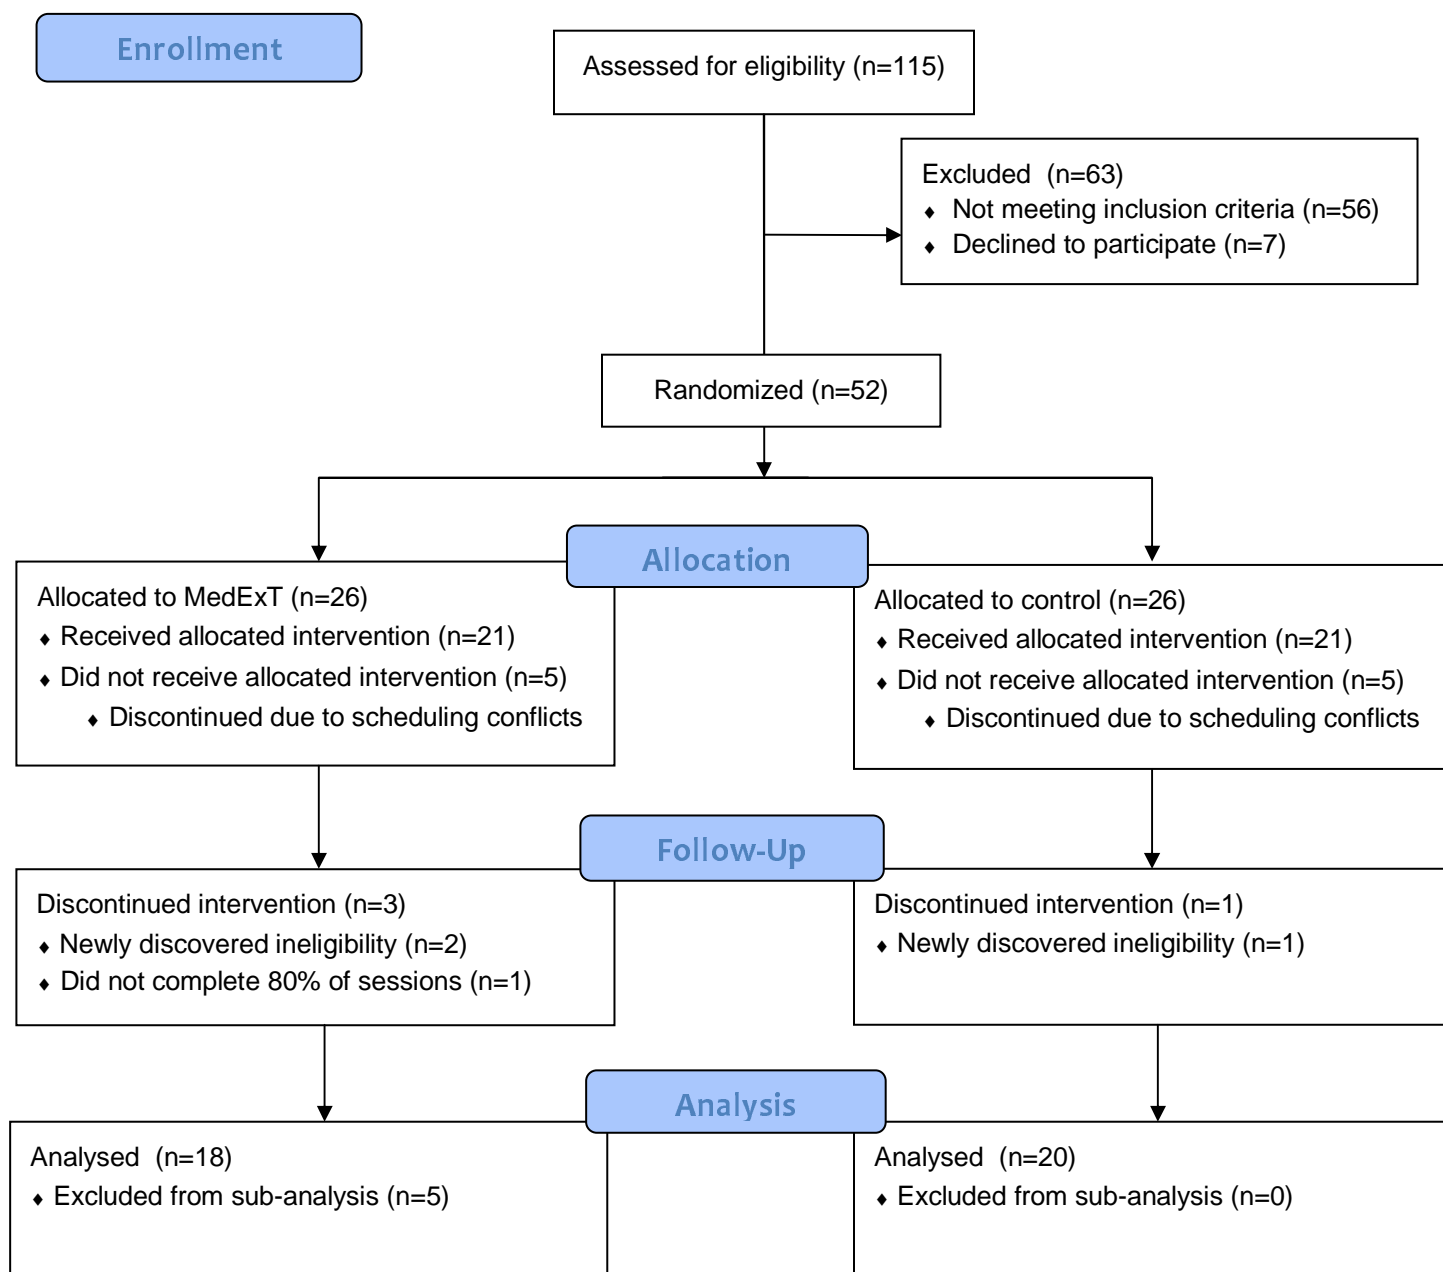

674 **Table 1.** Participant characteristics. Data are mean (SD). Abbreviations: BMI, body mass index;  
675 BP<sub>s</sub>, systolic blood pressure; BP<sub>d</sub>, diastolic blood pressure; IPAQ, International Physical Activity  
676 Questionnaire.

|                                | <b>MedExT</b><br>(n=18) | <b>Control</b><br>(n=20) | <b>All</b><br>(n=38) | <b>T-test, P</b> |
|--------------------------------|-------------------------|--------------------------|----------------------|------------------|
| Age (yrs)                      | 36.3 (14.1)             | 38.7 (16.8)              | 37.6 (15.4)          | 0.6432           |
| BMI                            | 24.5 (2.9)              | 26.3 (2.7)               | 25.4 (2.9)           | 0.0603           |
| Resting HR (bpm)               | 71.3 (12.4)             | 72.4 (12.0)              | 71.9 (12.0)          | 0.7892           |
| Resting BP <sub>s</sub> (mmHg) | 116.2 (10.7)            | 115.5 (8.8)              | 115.8 (9.6)          | 0.8208           |
| Resting BP <sub>d</sub> (mmHg) | 75.2 (8.1)              | 77.5 (6.2)               | 76.4 (7.2)           | 0.3331           |
| IPAQ (MET-min/wk)              | 2731 (2463)             | 2906 (2428)              | 2821 (2413)          | 0.8285           |
| Steps/day                      | 10778 (2518)            | 12029 (3514)             | 11437 (3107)         | 0.2198           |

677

678 **Figure 2.** Post-intervention effect of MedExT vs. control treatment on primary outcome:  
679 disability as measured by the Roland Morris Disability Questionnaire (RMDQ). MedExT  
680 participants show statistically significantly lower disability levels compared to control  
681 participants. Data shown as mean  $\pm$  SEM. RMDQ min score=0, max score=24. \* $p < 0.05$ .

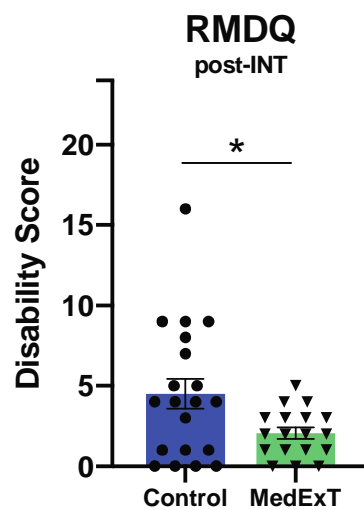

682 **Figure 3.** Pre to post-intervention effect of MedExT on secondary outcomes: (A) MedExT  
683 participants demonstrated statistically significant increases in mindfulness (FMI) ( $*p < 0.05$ )  
684 compared to baseline values. No significant changes were observed for (B) fear avoidance  
685 behavior (FABQ) and (C) state and (D) trait anxiety (STAI). FMI score range=14-56, FABQ=0-  
686 96, STAI=20-80. Data shown as mean  $\pm$  SEM. For psychological inventories (FABQ, STAI),  
687  $p > 0.02$ .

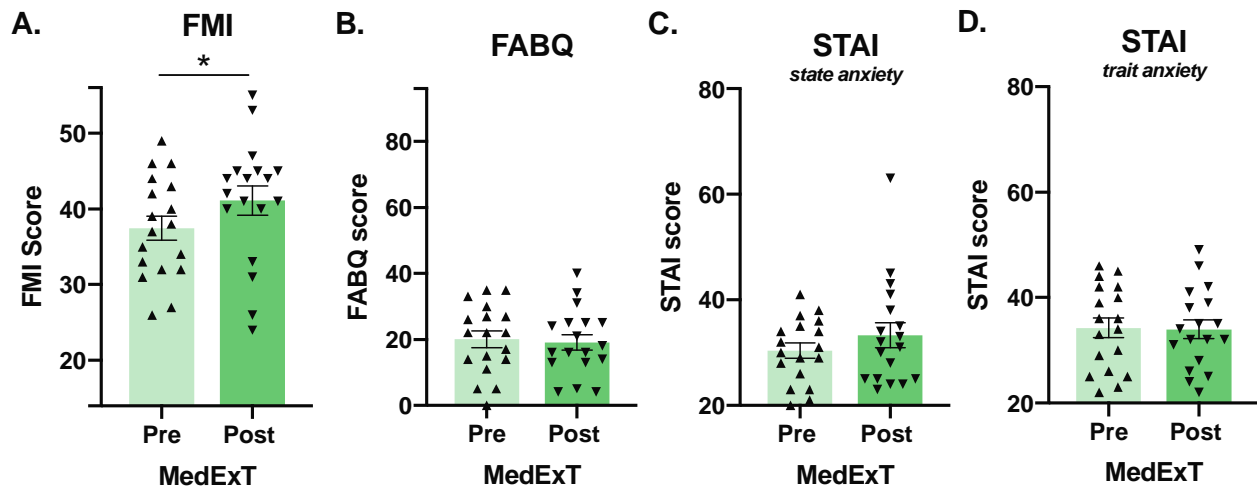



688 **Table 2.** Intervention effects on QST pain measures for MedExT and control groups. For all  
689 QST,  $p > 0.005$ .

690

| <b>QST</b>                                  | <b>T-test/Mann-Whitney, P</b> |                |
|---------------------------------------------|-------------------------------|----------------|
|                                             | <i>Low Back</i>               | <i>Forearm</i> |
| Mechanical Sensitivity                      | 0.6107                        | 0.1361         |
| Mechanical Pain                             | 0.1078                        | 0.4259         |
| Constant Heat VAS <i>Intensity</i>          | 0.2519                        | 0.7210         |
| Constant Heat VAS <i>Unpleasantness</i>     | 0.0635                        | 0.4789         |
| Pressure Pain Threshold                     | 0.9236                        | 0.2104         |
| Constant Pressure VAS <i>Intensity</i>      | 0.0746                        | 0.9141         |
| Constant Pressure VAS <i>Unpleasantness</i> | 0.0338                        | 0.7889         |

691 **Figure 4.** Intervention and acute effects of MedEXT intervention compared to control. Data shown as mean +/- SEM with “analgesic”  
 692 responses being values lower than “0” on y-axes. Intervention effects are shown in A-B comparing VAS measurement taken  
 693 immediately prior to each day’s session versus the baseline VAS measurement taken on intake day. Statistically significant analgesic  
 694 effects were seen in the MedEXT group for (A) VAS intensity (Time ( $***p=0.0008$ ), time x treatment ( $**p=0.0012$ )) and (B) VAS  
 695 unpleasantness (Treatment ( $*p=0.0330$ ), time ( $**p=0.0022$ ), time x treatment ( $****p<0.0001$ )). Acute intervention effects shown in C-D  
 696 comparing VAS taken after each day’s intervention to the VAS taken immediately before the intervention. No significant differences  
 697 were found for (C) VAS intensity (n.s.) while (D) a small effect of Treatment ( $**p=0.0049$ ) was found for VAS unpleasantness.

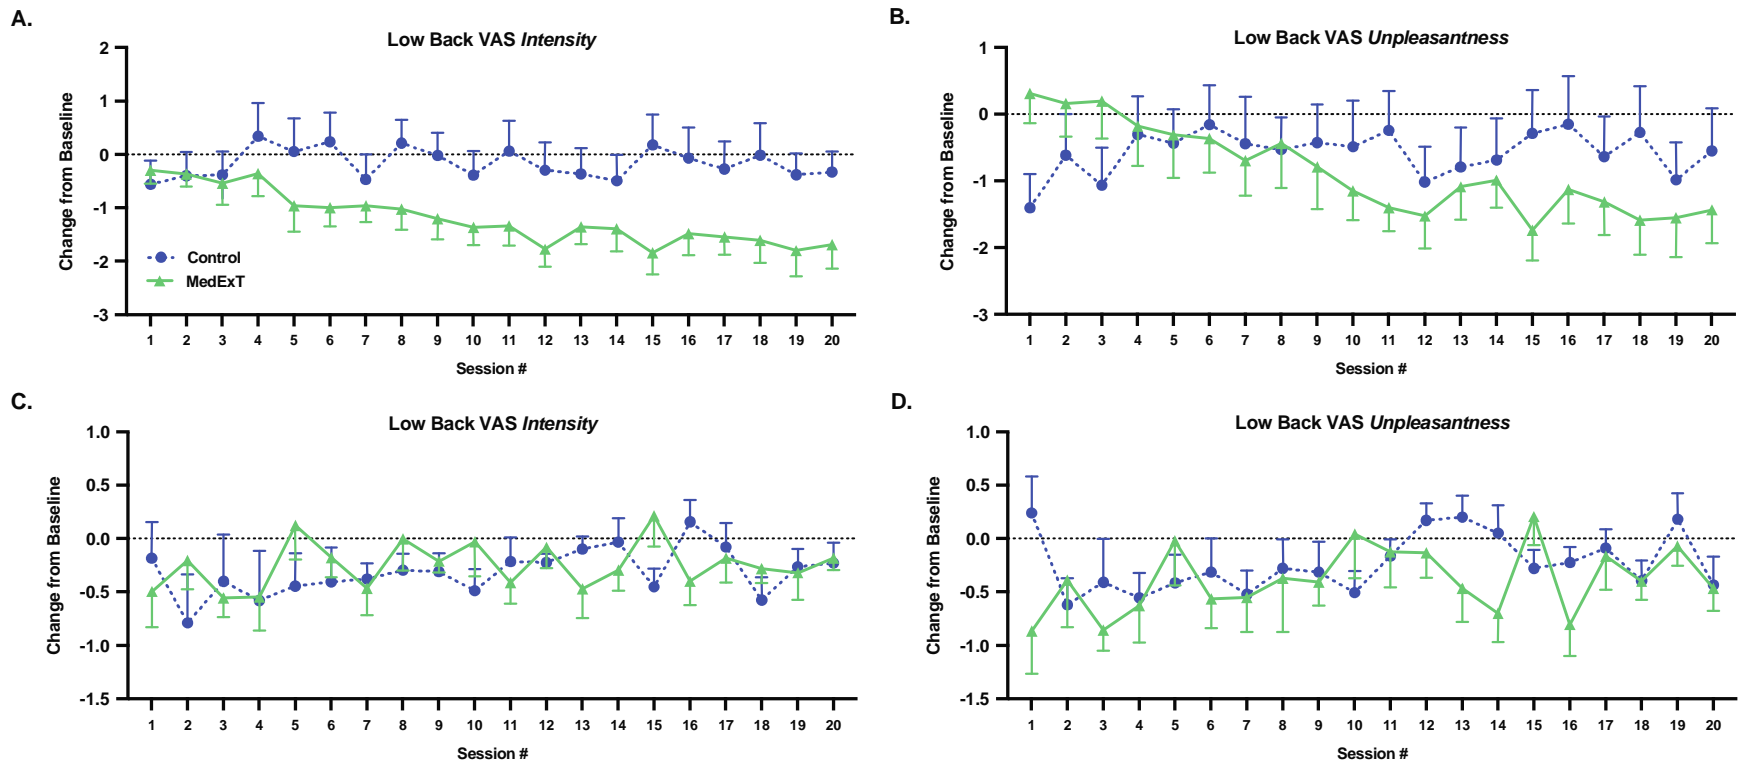

698

699 **Figure 5.** Average pain ratings for MedExT vs. control. Statistically significant decreases in  
700 reported (A) VAS intensity and (B) VAS unpleasantness were found comparing MedExT versus  
701 control participants. Scores represent a change from before the start of the intervention to after  
702 participation. Data shown as mean  $\pm$  SEM; negative values indicate a reduction in VAS pain  
703 score. \* $p < 0.025$ .  
704

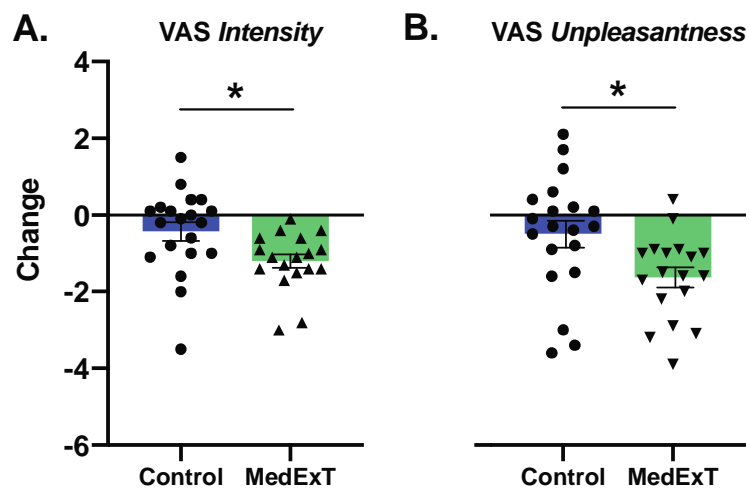

705 **Table 3.** Sub-analysis of participants that completed 80% or more sessions per week.

706

| <b>Survey data</b>                     | <b>T-test/Mann-Whitney, P</b> |                 |
|----------------------------------------|-------------------------------|-----------------|
| RMDQ                                   | <b>*0.0199</b>                |                 |
| FMI                                    | <b>*0.0427</b>                |                 |
| FABQ                                   | 0.8964                        |                 |
| STAI <i>state</i>                      | 0.3535                        |                 |
| STAI <i>trait</i>                      | 0.3275                        |                 |
| <b>QST</b>                             | <i>Low Back</i>               | <i>Forearm</i>  |
| Mechanical Sensitivity                 | 0.7889                        | 0.3609          |
| Mechanical Pain                        | 0.0262                        | 0.4551          |
| Constant Heat VAS <i>Intensity</i>     | 0.2289                        | 0.6966          |
| Constant Heat VAS <i>Unpleas.</i>      | 0.0471                        | 0.4153          |
| Pressure Pain Threshold                | 0.7198                        | 0.4615          |
| Constant Pressure VAS <i>Intensity</i> | 0.1925                        | 0.4670          |
| Constant Pressure VAS <i>Unpleas.</i>  | 0.0652                        | 0.9629          |
| <b>Average low back pain</b>           | <i>Intensity</i>              | <i>Unpleas.</i> |
| Change from before to during           | 0.1160                        | 0.0665          |

707 **Figure 6.** Continued patient compliance data. Shown below are the qualitative results of each  
 708 outcome. (A) Box plots are shown to represent data. Box represents IQR (bottom line=Q1,  
 709 middle=median, top=Q3. Whiskers represent range of data (min and max). (A) [Median=Q1 for  
 710 MedExT and Control for question 1]. (B) Self-reported barriers to continued treatment are shown  
 711 for the MedExT participants. (C) MedExT participants identified what the most beneficial aspect  
 712 of the intervention was between three choices: Meditation only, Exercise only, or Both  
 713 combined.

**A.**

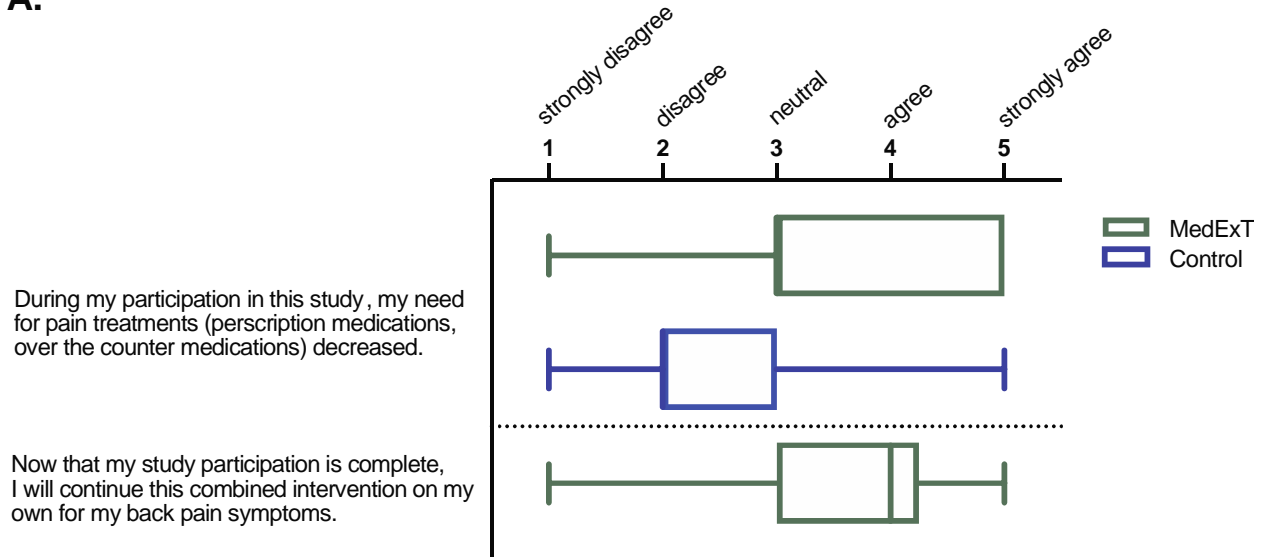

**B.**

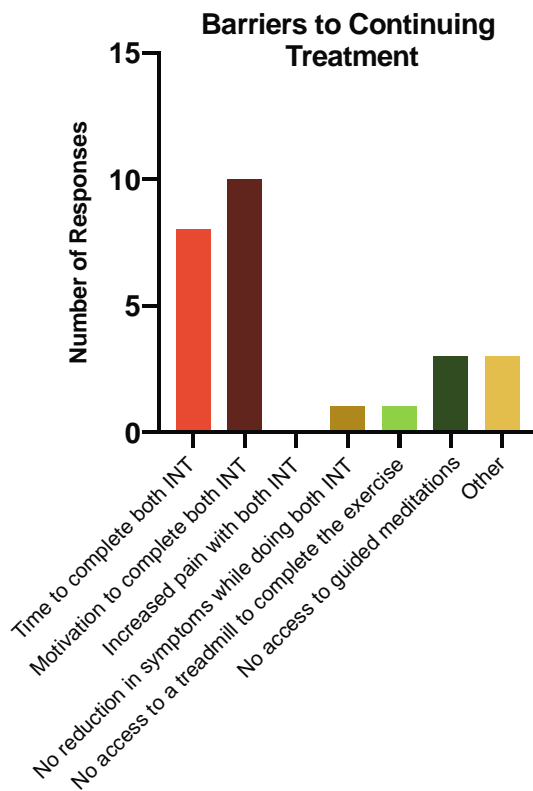

**C.**

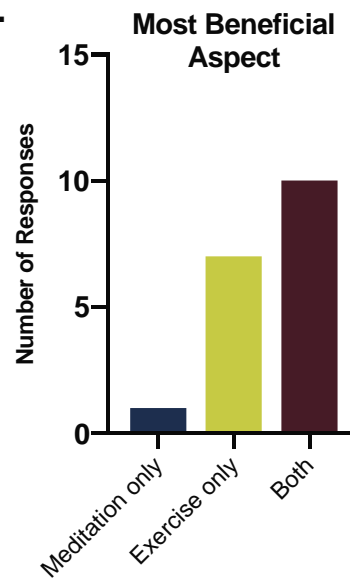

Source: https://www.biorxiv.org/content/10.1101/652735v1.full.pdf
